# Supplementary material
Source: Springer Nature journal article supplement (https://www.springermedizin.de/resource/supplementary/12891_2006_226_MOESM7_ESM.pdf/9510792)

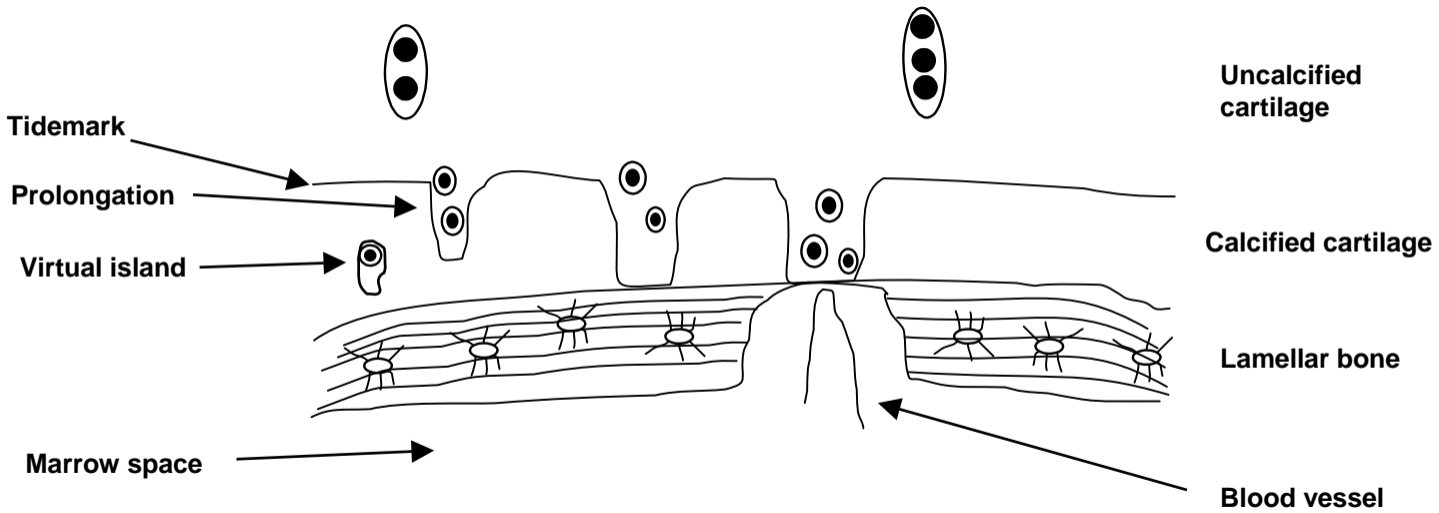

Supplement: MOESM7 [file 9510792]
